# Supplementary material for: Characterization of the Interaction Between the Small Regulatory Peptide SgrT and the EIICBGlc of the Glucose-Phosphotransferase System of E. coli K-12
Source: Metabolites. 2012 Oct 16;2(4):756–74. doi: 10.3390/metabo2040756 (PMC3901232; doi:10.3390/metabo2040756)
Supplement: Supplementary File 1 — Supplementary Material (PDF, 58 KB) [file metabolites-02-00756-s001.pdf]

**Supplemental material Table 3.** Oligonucleotides used in this study.

| Name         | Sequence (5' – 3')                                                                                |
|--------------|---------------------------------------------------------------------------------------------------|
| D388A+       | AAC GCC GGG TCG TGA AGC CGC GAC TGA AG                                                            |
| E387A+       | AAC GCC GGG TCG TGC AGA CGC GAC TGA AG                                                            |
| G385A+       | TGG ATC TGA AAA CGC CGG CTC GTG AAG ACG                                                           |
| Gfp2-        | CGC GAT ATC TTT GTA GAG CTC ATC CAT GCC                                                           |
| Gfp2+        | GAT GGT ACC GCC GCG CCA GCA CCC G                                                                 |
| HA-          | CGG GTA CCA GCG TAA TCT GGA ACG                                                                   |
| HA+          | GGG AGG CTT TAC CCA TAC GAT GTT CC                                                                |
| K150E-       | CAA GAT ACT CAG GCA GCT TAA TAC GGT AG                                                            |
| K150E+       | GCT TCT TTG CCG GTG AAC GCT TTG TGC C                                                             |
| K382A+       | TGG ATC TGG CAA CGC CGG GTC GTG AAG ACG                                                           |
| ktpg-        | GTG CTT TAA TCA GCA CGC GGA AGA TGG TG                                                            |
| P384A+       | TGG ATC TGA AAA CGG CGG GTC GTG AAG ACG                                                           |
| P384R+       | TGG ATC TGA AAA CGC GGG GTC GTG AAG ACG                                                           |
| pETS-        | GCG GGA TCC ACT TTC AGA ATT GCG G                                                                 |
| pETS+        | CGC CTC GAG GCA GTT TTA TCA GC                                                                    |
| pMRB+        | CAT GCA TGC GCG ACT GAA GAT GC                                                                    |
| pMRC-        | GCG GAC GTC AGA TCC AGT GCT TTA ATC                                                               |
| pMRCL-       | GGG GAC GTC GTC GCT TTT GCA TCT TCA GTC                                                           |
| pMRCL-P384R- | GAT GAC GTC GCG TCT TCA CGA CCC CGC GTT TTC                                                       |
| pMRG-        | CGC GAC GTC GGG TTA CGG ATG TAC TC                                                                |
| pMRG+        | CCC GCA TGC TTT AAG AAT GCA TTT GC                                                                |
| pMRLB+       | CAT GCA TGC GGA TCT GAA AAC GCC                                                                   |
| pMRLB-P384R+ | CAT GCA TGC GGA TCT GAA AAC GCG GGG TCG                                                           |
| R386A+       | AAC GCC GGG TGC TGA AGA CGC GAC TGA AG                                                            |
| red-         | TTCAGATCCAGTGCTTTAATCAGCACGCG                                                                     |
| SgrS-        | AGC AGG TAT AAT CTG CTG GCG GGT GAT TTT ACA CCA ATA CTC AGT CAC ACC ATA TGA<br>ATA TCC TCC TTA    |
| SgrT-        | AGG CAA GCT TAC TTT CAG AAT TGC GGT                                                               |
| SgrT+        | CCC CTG CAG CAG TTT TAT CAG CAC TAT TTT ACC                                                       |
| SgrT2-       | CGC GGT ACC AAG CTT ACT TTC                                                                       |
| SrgR+        | GGT GGC GCA AAC CAC GCT GAT TTA AAA TCG AAC CAG CCG AGG GTA TTC ATG TGT<br>AGG CTG GAG CTG CTT CG |
| T383A+       | TGG ATC TGA AAG CGC CGG GTC GTG AAG ACG                                                           |
| TacPO+       | CAC AGT ACT CTA TCG CTA CGT GAC                                                                   |
| V12F-        | CAA ATG CAT TCT TAA ACT GCA GCA TAT G                                                             |
| V12F+        | CTA ACC TGC AAA AGT TCG GTA AAT CGC TG                                                            |
